# Supplementary material for: Estimating the Legacy Effect of Post-Cutting Shelterbelt on Crop Yield Using Google Earth and Sentinel-2 Data
Source: MDPI journal article supplement (doi:10.3390/rs14195005), 2022-10-08
Supplement: s1 [file s1]

Archive with 1 entries (1 files):
- remotesensing-1892771-supplementary.pdf
