# Supplementary material for: Estimating the Legacy Effect of Post-Cutting Shelterbelt on Crop Yield Using Google Earth and Sentinel-2 Data
Source: MDPI journal article supplement (doi:10.3390/rs14195005), 2022-10-08
Supplement: s1 [file s1 › remotesensing-1892771-supplementary.pdf]

### Supplementary file

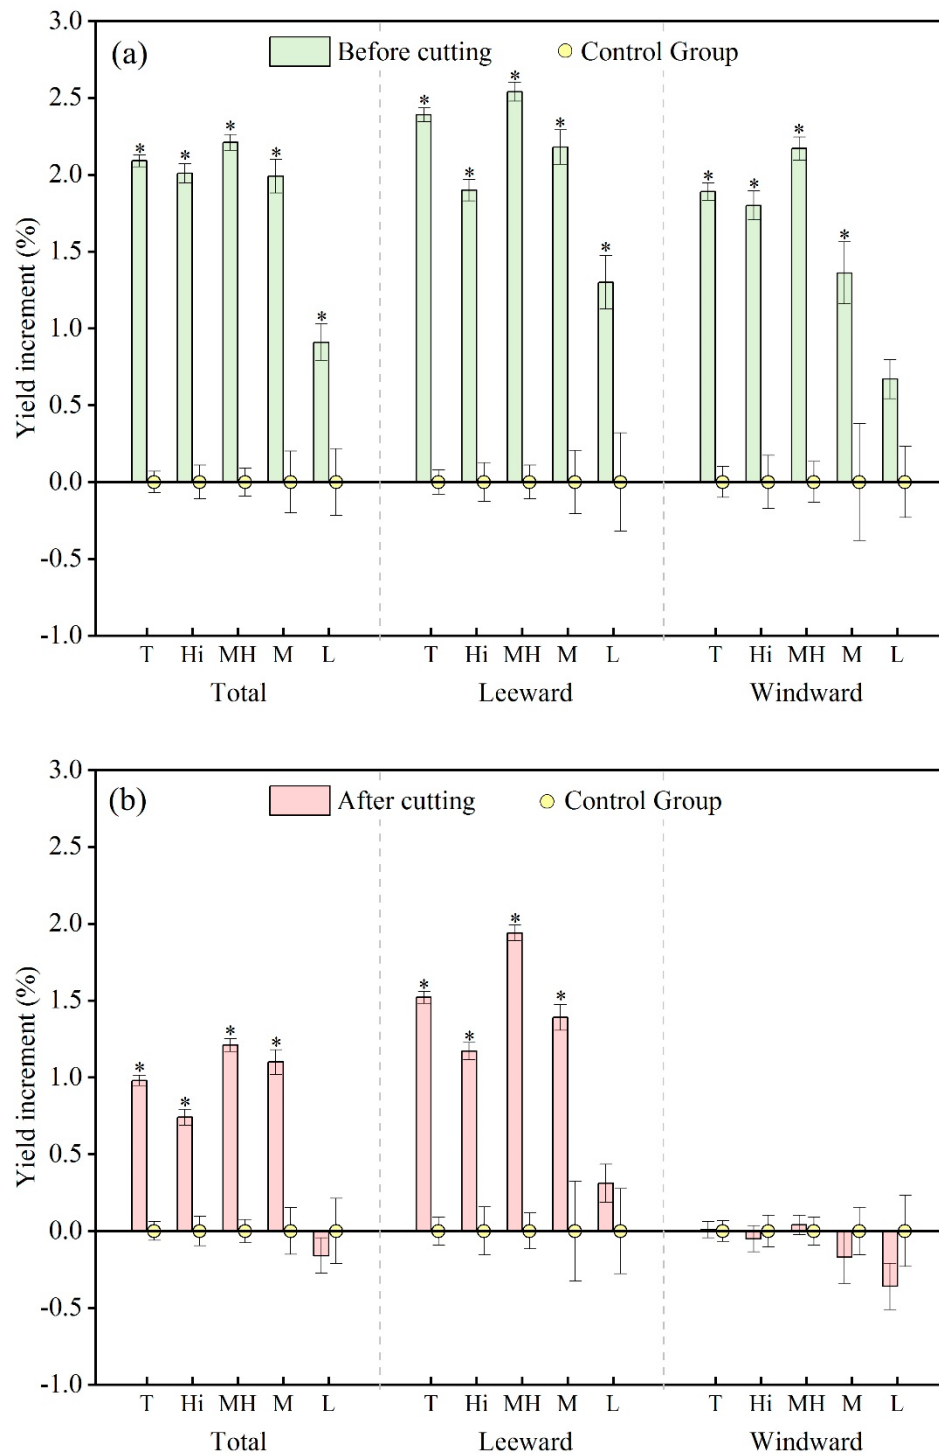

Figure S1. The significant difference of yield increment of shelterbelt before (a) and after (b) cutting. The control group is the average relative yield within the distance of 15 to 20 H that is not affected by the shelterbelt. Error bar represent the standard error. The star symbol means the yield increment has significant difference ( $p < 0.05$ ) from the

control group. The x-axis represents the shelterbelt classification (T: all densities, Hi: high density, M-H: medium-high density, M: medium density, L: low density).
